# Supplementary material for: Gut dysbiosis and antimicrobial resistance among women living with HIV, with recurrent urinary tract infections in Uganda: a cross-sectional study
Source: Research Square preprint supplement (doi:10.21203/rs.3.rs-7593174/v1), 2025-09-12
Supplement: Supplementary file 1 [file bc3a354a0cf81cad66be3ee6.docx]

Supplementary information - **Gut dysbiosis and antimicrobial resistance among women living with HIV, with recurrent urinary tract infections in Uganda: a cross-sectional study**

Table 1: Codebook for questionnaire and Urine Microbiology data

| **Field name** | **Field label** | **Field type** | **Field length** | **Field values** | **Value labels** | **Notes** |
| --- | --- | --- | --- | --- | --- | --- |
| pid | Participant ID | S | 12 | KIT-E-TM 511 - KIT-E-TM 623 | |  |
| age | Participant Age | I | 2 | 21 - 80 |  |  |
| occup | Occupation | I | 1 | 0 | Level 1: Entry-Level/Low-Skill/Informal Sector | |
|  |  |  |  | 1 | Level 2: Skilled/Semi-Formal/Small Business/Experienced: | |
|  |  |  |  | 2 | Level 3: Professional/Managerial/Formal/Retired: | |
| educ | The highest level of education attained by the participant | I | 1 | 0 | None |  |
|  |  |  |  | 1 | Primary |  |
|  |  |  |  | 2 | Secondary |  |
|  |  |  |  | 3 | Vocational |  |
| marital | Marital status of the participant | I | 1 | 0 | Single |  |
|  |  |  |  | 1 | Married |  |
|  |  |  |  | 2 | Separated |  |
| weight | What is the participant's weight in kgs? | I | 3 | 44 - 123 |  |  |
| height | Participant's height in meters | I | 4 | 1.43 - 1.76 |  | Invalid values: 168 and 169 |
| bmi | Participant's calculated BMI | I | 4 | 19.1 - 45.2 |  |  |
| income | How much income does the participant earn monthly? | I | 1 | 0 | less than 100,000UGX |  |
|  |  |  |  | 1 | 100,000-500,000UGX |  |
|  |  |  |  | 2 | above 500,00 UGX |  |
| diet | Which of the following best describes the participant's diet | I | 1 | 0 | Eats all the following each day( carbohydrate, protein, friuts and vegetables) | |
|  |  |  |  | 1 | Eats predominatly snacky/fast foods | |
| cd4 | Participant's CD4 count | I | 1 | 0 | < 200 cells/mm3 |  |
|  |  |  |  | 1 | > 200 cells/mm3 |  |
| recentvl | Participant's most recent VL viral load | I | 6 | 0-310000 |  |  |
| recentvln | Participant's most recent VL viral load | I | 1 | 0 | Not detected/Detected, below limit of quantification | |
|  |  |  |  | 1 | Detectable |  |
| vlquant | Participant's most recent VL viral load | I | 6 | 50-310000 |  |  |
| vldate | VL Date of Collection | D | 10 | 05/09/2023 - 03/03/2025 | |  |
| durart | How long have you been on ART? | I | 1 | 0 | < 1 yr |  |
|  |  |  |  | 1 | 1-5 yr |  |
|  |  |  |  | 2 | > 5 yr |  |
| cartreg | What is the participant's current ART regimen | I | 1 | 0 | ABC/3TC/DTG |  |
|  |  |  |  | 1 | AZT/3TC/DTG |  |
|  |  |  |  | 2 | TDF/3TC/ATV/r |  |
|  |  |  |  | 3 | TDF/3TC/DTG |  |
|  |  |  |  | 4 | TDF/3TC/EFV |  |
| utisixm | Does participant have previous histor of UTI in the last 6 month | I | 1 | 0 | No |  |
|  |  |  |  | 1 | Yes |  |
| usixmepi | If yes, how many episodes | I | 1 | 1 to 2 |  |  |
| uti12m | Does participant have previous histor of UTI in the last 12 mont | I | 1 | 0 | No |  |
|  |  |  |  | 1 | Yes |  |
| u12mepi | Field19 | I | 1 | 1 to 2 |  |  |
| recurruti | Recurrent UTI | I | 1 | 0 | No |  |
|  |  |  |  | 1 | Yes |  |
| cgitsymp | Does the participant currently have any symptoms of gastrointest | I | 1 | 0 | No |  |
|  |  |  |  | 1 | Yes |  |
| q16b | If yes, which of the following | I | 1 | 0 | Abdominal pain |  |
|  |  |  |  | 1 | Bloating |  |
|  |  |  |  | 2 | Diarrhea |  |
| abxsixm | Does the participant have any History of Antibiotic use in the p | I | 1 | 0 | No |  |
|  |  |  |  | 1 | Yes |  |
| ctxsixm | Does the participant have any History of Cotrimoxazole use in th | I | 1 | 0 | No |  |
|  |  |  |  | 1 | Yes |  |
| ctxind | If yes, what is the indication od CTX use | S |  |  |  |  |
| curctx | Is the participant currently on CTX prophylaxis | I | 1 | 0 | No |  |
|  |  |  |  | 1 | Yes |  |
| lnmp | Participant LNMP | D | 10 |  |  |  |
| fpmcurr | Is the participant using any family planning methods currently? | I | 1 | 0 | No |  |
|  |  |  |  | 1 | Yes |  |
| fpmeth | Field29 | I | 1 | 0 | Oral hormonal pills |  |
|  |  |  |  | 1 | Implant |  |
|  |  |  |  | 2 | Tubal ligation |  |
| sexact | Has the participant been sexually active in the past 6 months? | I | 1 | 0 | No |  |
|  |  |  |  | 1 | Yes |  |
| sexpart | If yes, with what kind of sexaul partner | I | 1 | 0 | Casual( only sexual encounter, no relationship) |  |
|  |  |  |  | 1 | Steady( 1 to 4 yrs' relationship) |  |
|  |  |  |  | 2 | Long term (relationship of 5 or more yrs) |  |
| cleanwat | Washing with clean water only | I | 2 | 0-90 |  |  |
| soap | Washing with soap and water | I | 2 | 0-60 |  |  |
| steam | Steaming | I | 2 | 0-20 |  |  |
| douch | Douching | I | 2 | 0-60 |  |  |
| herbs | Inserting herbs | I | 2 | 0-3 |  |  |
| hxchronic | Does the participant have any History of Chronic Disease? | I | 1 | 0 | No |  |
|  |  |  |  | 1 | Yes |  |
| chronicd | If yes, which chronic disease? | S |  |  |  |  |
| treatchr | Is the participant currently on treament for the above disease | I | 1 | 0 | No |  |
|  |  |  |  | 1 | Yes |  |
| controlchr | Is the disease well controlled? | I | 1 | 0 | No |  |
|  |  |  |  | 1 | Yes |  |
| diagdate | Diagnosis Date (Previous UTI episode) | D | 10 | 09/04/2024 - 15/01/2025 | |  |
| sympdur | Symptoms and their duration | S |  |  |  |  |
| symp1 | Painful unrination or discomfort | I | 1 | 0 | No |  |
|  |  |  |  | 1 | Yes |  |
| symp2 | Lower abdominal pain | I | 1 | 0 | No |  |
|  |  |  |  | 1 | Yes |  |
| symp3 | Suprapubic pain | I | 1 | 0 | No |  |
|  |  |  |  | 1 | Yes |  |
| symp4 | Unrinary frequency | I | 1 | 0 | No |  |
|  |  |  |  | 1 | Yes |  |
| symp5 | Foul smell | I | 1 | 0 | No |  |
|  |  |  |  | 1 | Yes |  |
| symp6dur | Duration in days | I | 2 | 2 to 60 |  |  |
| urimic | Urinalysis, microscopy or culture tests doen and their results | S |  |  |  |  |
| abxtgive | Antibiotic treatment given | S |  |  |  |  |
| rinfo | Other relevant information | S |  |  |  |  |
| isolated | micro-organism isolated | I | 1 | 2 | Bacteria isolated and identified |  |
|  |  |  |  | 1 | Mixed Bacterial Growth |  |
|  |  |  |  | 0 | No Bacterial Growth/No Significant Bacterial Growth | |
| leucount | Leucocyte count >10 cells/ul | I | 1 | 1 | Yes |  |
|  |  |  |  | 0 | No |  |
| leucoest | Presence of Leucocyte esterase | I | 1 | 1 | Yes |  |
|  |  |  |  | 0 | No |  |
| nitrites | Presence of Nitrites | I | 1 | 1 | Yes |  |
|  |  |  |  | 0 | No |  |
| isolatedroc | micro-organism isolated | I | 1 | 1 | Bacteria isolated and identified (Yes) | |
|  |  |  |  | 0 | Mixed Bacterial Growth (No) |  |
|  |  |  |  | 0 | No Bacterial Growth/No Significant Bacterial Growth (No) | |

Table 2: Results from questionnaire and Urine Microbiology data analysis

| **Table 1:** Socio-demographics and behavioral characteristics of the participants | | | | | |  |  |  |  |
| --- | --- | --- | --- | --- | --- | --- | --- | --- | --- |
| **Characteristic** | **N (%) or Median (IQR)** | |  |  |  |  |  |  |  |
| **Age**, years | 36 (32, 46) |  |  |  |  |  |  |  |  |
| **Highest educational attainment** | |  |  |  |  |  |  |  |  |
| None | 3 (4.8) |  |  |  |  |  |  |  |  |
| Primary | 34 (54.8) |  |  |  |  |  |  |  |  |
| Secondary | 21 (33.9) |  |  |  |  |  |  |  |  |
| Vocational | 4 (6.5) |  |  |  |  |  |  |  |  |
| **Marital status** |  |  |  |  |  |  |  |  |  |
| Single | 19 (30.7) |  |  |  |  |  |  |  |  |
| Married | 33 (53.2) |  |  |  |  |  |  |  |  |
| Separated | 10 (16.1) |  |  |  |  |  |  |  |  |
| **Body Mass Index**, kg/m2 | 25.7 (23.1, 31.8) |  |  |  |  |  |  |  |  |
| **Income level** |  |  |  |  |  |  |  |  |  |
| Less than 100,000UGX | 22 (35.5) |  |  |  |  |  |  |  |  |
| Between 100,000 - 500,000UGX | 38 (61.3) |  |  |  |  |  |  |  |  |
| Above 500,00 UGX | 2 (3.2) |  |  |  |  |  |  |  |  |
| **Diet** |  |  |  |  |  |  |  |  |  |
| Eats all the following each day (carbohydrate, protein, friuts, and vegetables) | 60 (96.8) |  |  |  |  |  |  |  |  |
| Eats predominatly snacky/fast foods | 2 (3.2) |  |  |  |  |  |  |  |  |
| **Currently using family planning method** | | |  |  |  |  |  |  |  |
| No | 49 (79.0) |  |  |  |  |  |  |  |  |
| Yes | 13 (21.0) |  |  |  |  |  |  |  |  |
| **Type of family planning method currently being used** | | | |  |  |  |  |  |  |
| Oral hormonal pills | 2 (15.4) |  |  |  |  |  |  |  |  |
| Implant | 10 (76.9) |  |  |  |  |  |  |  |  |
| Tubal ligation | 1 (7.7) |  |  |  |  |  |  |  |  |
| **Sexually active** |  |  |  |  |  |  |  |  |  |
| No | 18 (29.0) |  |  |  |  |  |  |  |  |
| Yes | 44 (71.0) |  |  |  |  |  |  |  |  |
| **Sexual partner** |  |  |  |  |  |  |  |  |  |
| Casual (only sexual encounter/no relationship) | 10 (22.7) |  |  |  |  |  |  |  |  |
| Steady (1 to 4 years' relationship) | 11 (25.0) |  |  |  |  |  |  |  |  |
| Long term (relationship of 5 or more years) | 23 (52.3) |  |  |  |  |  |  |  |  |
| **Vaginal hygiene practices** | |  |  |  |  |  |  |  |  |
| Washing with clean water only | 55 (88.7) |  |  |  |  |  |  |  |  |
| Washing with soap and water | 11 (17.7) |  |  |  |  |  |  |  |  |
| Steaming | 8 (12.9) |  |  |  |  |  |  |  |  |
| Douching | 12 (19.4) |  |  |  |  |  |  |  |  |
| Inserting herbs | 2 (3.2) |  |  |  |  |  |  |  |  |
|  |  |  |  |  |  |  |  |  |  |
|  |  |  |  |  |  |  |  |  |  |
| **Table 2:** HIV and chronic disease history | | |  |  |  |  |  |  |  |
| **Characteristic** | **N (%) or Median (IQR)** |  |  |  |  |  |  |  |  |
| **Duration on ART** |  |  |  |  |  |  |  |  |  |
| < 1 year | 1 (1.6) |  |  |  |  |  |  |  |  |
| 1-5 year | 7 (11.3) |  |  |  |  |  |  |  |  |
| > 5 year | 54 (87.1) |  |  |  |  |  |  |  |  |
| **Current ART regimen** |  |  |  |  |  |  |  |  |  |
| ABC/3TC/DTG | 2 (3.2) |  |  |  |  |  |  |  |  |
| AZT/3TC/DTG | 3 (4.8) |  |  |  |  |  |  |  |  |
| TDF/3TC/ATV/r | 2 (3.2) |  |  |  |  |  |  |  |  |
| TDF/3TC/DTG | 54 (87.1) |  |  |  |  |  |  |  |  |
| TDF/3TC/EFV | 1 (1.6) |  |  |  |  |  |  |  |  |
| **CD4 count** |  |  |  |  |  |  |  |  |  |
| < 200 cells/mm3 | 4 (6.5) |  |  |  |  |  |  |  |  |
| > 200 cells/mm3 | 58 (93.5) |  |  |  |  |  |  |  |  |
| **Recent viral load** |  |  |  |  |  |  |  |  |  |
| Not detected/Detected, below limit of quantification (<50 copies/ml) | 50 (80.7) |  |  |  |  |  |  |  |  |
| Detectable | 12 (19.3) |  |  |  |  |  |  |  |  |
| **Viral load result** (detectable ≥ 50 copies/ml) | 286 (51, 2862) |  |  |  |  |  |  |  |  |
| **History of chronic disease (other than HIV)** | | |  |  |  |  |  |  |  |
| No | 48 (78.7) |  |  |  |  |  |  |  |  |
| Yes | 13 (21.3) |  |  |  |  |  |  |  |  |
| **Chronic diseases** |  |  |  |  |  |  |  |  |  |
| Asthma | 4 (30.8) |  |  |  |  |  |  |  |  |
| Atopic dermatitis | 1 (7.7) |  |  |  |  |  |  |  |  |
| COPD | 1 (7.7) |  |  |  |  |  |  |  |  |
| Hypertension | 7 (53.8) |  |  |  |  |  |  |  |  |
| **Currently on chronic disease treament** | | |  |  |  |  |  |  |  |
| No | 5 (38.5) |  |  |  |  |  |  |  |  |
| Yes | 8 (61.5) |  |  |  |  |  |  |  |  |
| **Chronic disease well controlled** | |  |  |  |  |  |  |  |  |
| No | 8 (61.5) |  |  |  |  |  |  |  |  |
| Yes | 5 (38.5) |  |  |  |  |  |  |  |  |
|  |  |  |  |  |  |  |  |  |  |
|  |  |  |  |  |  |  |  |  |  |
| **Table 3:** GI, UTI, and antibiotic use history | | |  |  |  |  |  |  |  |
| **Characteristic** | **N (%) or Median (IQR)** | |  |  |  |  |  |  |  |
| **Number of UTIs in the past 6 month** (including current episode) | | | |  |  |  |  |  |  |
| 1 | 50 (80.7) |  |  |  |  |  |  |  |  |
| 2 | 10 (16.1) |  |  |  |  |  |  |  |  |
| 3 | 2 (3.2) |  |  |  |  |  |  |  |  |
| **Number of UTIs in the past 12 month** (including current episode) | | | | |  |  |  |  |  |
| 1 | 54 (87.1) |  |  |  |  |  |  |  |  |
| 2 | 6 (9.7) |  |  |  |  |  |  |  |  |
| 3 | 2 (3.2) |  |  |  |  |  |  |  |  |
| **Recurrent UTIs** |  |  |  |  |  |  |  |  |  |
| No | 49 (79.0) |  |  |  |  |  |  |  |  |
| Yes | 13 (21.0) |  |  |  |  |  |  |  |  |
| **Current symptoms of GI disorder** | |  |  |  |  |  |  |  |  |
| No | 47 (75.8) |  |  |  |  |  |  |  |  |
| Yes | 15 (24.2) |  |  |  |  |  |  |  |  |
| **GI disorder** |  |  |  |  |  |  |  |  |  |
| Abdominal pain | 9 (60.0) |  |  |  |  |  |  |  |  |
| Bloating | 2 (13.3) |  |  |  |  |  |  |  |  |
| Diarrhea | 4 (26.7) |  |  |  |  |  |  |  |  |
| **Antibiotic use in the past 6 month** | |  |  |  |  |  |  |  |  |
| No | 37 (59.7) |  |  |  |  |  |  |  |  |
| Yes | 25 (40.3) |  |  |  |  |  |  |  |  |
| **Cotrimoxazole use in the past 6 month** | | |  |  |  |  |  |  |  |
| No | 48 (77.4) |  |  |  |  |  |  |  |  |
| Yes | 14 (22.6) |  |  |  |  |  |  |  |  |
| **Indication for cotrimoxazole** | |  |  |  |  |  |  |  |  |
| High viraemia | 1 (7.1) |  |  |  |  |  |  |  |  |
| Low viraemia | 2 (14.3) |  |  |  |  |  |  |  |  |
| Newly initiated on ART and pregnant | 1 (7.1) |  |  |  |  |  |  |  |  |
| Pregnancy | 7 (50.0) |  |  |  |  |  |  |  |  |
| Stage 3 event | 1 (7.1) |  |  |  |  |  |  |  |  |
| Suspected treatment failure | 2 (14.3) |  |  |  |  |  |  |  |  |
| **Currently on CTX prophylaxis** | |  |  |  |  |  |  |  |  |
| No | 52 (83.9) |  |  |  |  |  |  |  |  |
| Yes | 10 (16.1) |  |  |  |  |  |  |  |  |
|  |  |  |  |  |  |  |  |  |  |
|  |  |  |  |  |  |  |  |  |  |
| **Table 4:** UTI symptoms, duration, urinalysis, and treatment | | | |  |  |  |  |  |  |
|  | Previous episode (N=15), n (%) or Median (IQR) | Current episode (N=62), n (%) or Median (IQR) | | | |  |  |  |  |
| **Symptoms** |  |  |  |  |  |  |  |  |  |
| Dysuria | 8 (53.3) | 47 (75.8) |  |  |  |  |  |  |  |
| Suprapubic pain | 11 (73.4) | 47 (75.8) |  |  |  |  |  |  |  |
| Increased urinary frequency | 2 (13.3) | 29 (46.8) |  |  |  |  |  |  |  |
| Urinary urgency | 1 (6.7) | 11 (17.7) |  |  |  |  |  |  |  |
| **Duration of symptoms (days)** | **5 (3, 14)** | **5 (3, 5)** |  |  |  |  |  |  |  |
| **Urinalysis** |  |  |  |  |  |  |  |  |  |
| Leukocyte count (>10 cells/µl) | 9 (60.0) | 35 (56.5) |  |  |  |  |  |  |  |
| Leukocyte esterase | 5 (33.3) | 45 (72.6) |  |  |  |  |  |  |  |
| Nitrites |  | 11 (17.7) |  |  |  |  |  |  |  |
| **Antibiotics** |  |  |  |  |  |  |  |  |  |
| Cefixime | 6 (40.0) | 25 (40.3) |  |  |  |  |  |  |  |
| Metronidazole | 3 (20.0) | 3 (4.8) |  |  |  |  |  |  |  |
| Tinidazole | 1 (6.7) | 1 (1.6) |  |  |  |  |  |  |  |
| Nitrofurantoin | 1 (6.7) | 31 (50.0) |  |  |  |  |  |  |  |
| Ciprofloxacin | 2 (13.3) | 18 (29.0) |  |  |  |  |  |  |  |
| Doxycycline | 5 (33.3) | 5 (8.1) |  |  |  |  |  |  |  |
| Ceftriaxone | 1 (6.7) | 1 (1.6) |  |  |  |  |  |  |  |
|  |  |  |  |  |  |  |  |  |  |
|  |  |  |  |  |  |  |  |  |  |
| **Table 5:** Isolated bacteria from urine samples and their resistance profiles | | | | |  |  |  |  |  |
| **Organism** | **Ampicillin** | **Augmentin** | **Cefepime** | **Cefotaxime** | **Ceftazidime** | **Cefuroxime (Oral)** | **Ciprofloxacin** | **Gentamicin** | **Imipenem** |
| **Citrobacter spp (N=1)** |  |  |  |  |  |  |  |  |  |
| S |  |  |  | 1 (100.0) | 1 (100.0) |  | 1 (100.0) | 1 (100.0) | 1 (100.0) |
| I |  | 1 (100.0) | 1 (100.0) |  |  |  |  |  |  |
| R |  |  |  |  |  |  |  |  |  |
| **Coagulase-negative Staphylococcus (N=1)** | | |  |  |  |  |  |  |  |
| **Enterococcus spp (N=1)** | |  |  |  |  |  |  |  |  |
| **Escherichia coli (N=10)** |  |  |  |  |  |  |  |  |  |
| S | 1 (10.0) | 5 (50.0) | 3 (37.5) | 4 (40.0) | 5 (50.0) | 1 (100.0) | 5 (50.0) | 10 (100.0) | 10 (100.0) |
| I | 1 (10.0) | 5 (50.0) | 1 (12.5) |  | 2 (20.0) |  |  |  |  |
| R | 8 (80.0) |  | 4 (50.0) | 6 (60.0) | 3 (30.0) |  | 5 (50.0) |  |  |
| **Klebsiella pneumoniae (N=1)** | |  |  |  |  |  |  |  |  |
| S |  |  | 1 (100.0) | 1 (100.0) | 1 (100.0) |  |  | 1 (100.0) | 1 (100.0) |
| I |  | 1 (100.0) |  |  |  |  | 1 (100.0) |  |  |
| R | 1 (100.0) |  |  |  |  |  |  |  |  |
| **Micrococcus species (N=1)** | |  |  |  |  |  |  |  |  |
| **Mixed Bacterial Growth (N=13)** | |  |  |  |  |  |  |  |  |
| **No Bacterial Growth (N=1)** | |  |  |  |  |  |  |  |  |
| **No Significant Bacterial Growth (N=33)** | | |  |  |  |  |  |  |  |
|  |  |  |  |  |  |  |  |  |  |
|  |  |  |  |  |  |  |  |  |  |
| **Table 6:** Factors associated with recurrent UTIs | | |  |  | **Table 7:** Comparison of participant characteristics with and without recurrent UTIs | | | | |
| **Characteristic** | **Recurrent UTI, n (%) or Mean (SE)** | **cOR (95% CI)** | **p value** |  | **Characteristic** | **No rcurrent UTI (N=49), n (%) or Mean (SE)** | **Recurrent UTI (N=13), n (%) or Mean (SE)** | **pvalue** |  |
| **Age** (Mean, SE), years | 41.1 (3.9) | 1.01 (0.96-1.07) | 0.571 |  | **Age** (Mean, SE), years | 38.9 (1.6) | 41.1 (3.9) | 0.915 | Two-sample Wilcoxon rank-sum (Mann-Whitney) test |
| **Educational level** |  |  |  |  | **Educational level** |  |  |  |  |
| Vocational/Secondary | 4 (16.0) | 0.60 (0.12-2.51) | 0.534 |  | Vocational/Secondary | 21 (84.0) | 4 (16.0) | 0.534 | Fisher's exact |
| Primary/None | 9 (24.3) | Reference |  |  | Primary/None | 28 (75.7) | 9 (24.3) |  |  |
| **Body Mass Index** (Mean, SE), kg/m2 | 27.7 (2.1) | 1.01 (0.91-1.11) | 0.839 |  | **Body Mass Index** (Mean, SE), kg/m2 | 27.3 (0.8) | 27.7 (2.1) | 0.881 | Two-sample Wilcoxon rank-sum (Mann-Whitney) test |
| **Recent viral load done** |  |  |  |  | **Recent viral load done** |  |  |  |  |
| Detected | 2 (16.7) | 0.71 (0.07-4.15) | 0.728 |  | Detected | 10 (83.3) | 2 (16.7) | 1.000 | Fisher's exact |
| Not detected/Detected, below limit of quantification (<50 copies/ml) | 11 (22.0) | Reference |  |  | Not detected/Detected, below limit of quantification (<50 copies/ml) | 39 (78.0) | 11 (22.0) |  |  |
| **Current GIT symptoms** |  |  |  |  | **Current GIT symptoms** |  |  |  |  |
| Yes | 5 (33.3) | 2.40 (0.50-10.70) | 0.272 |  | Yes | 10 (66.7) | 5 (33.3) | 0.272 | Fisher's exact |
| No | 8 (17.0) | Reference |  |  | No | 39 (83.0) | 8 (17.0) |  |  |
| **Antibiotics use in the past 6 months** | | |  |  | **Antibiotics use in the past 6 months** | | |  |  |
| Yes | 13 (52.0) | 50.45 (7.58-+Inf) | **<0.001** |  | Yes | 12 (48.0) | 13 (52.0) | **<0.001** | Fisher's exact |
| No | 0 (0) | Reference |  |  | No | 37 (100) | 0 (0) |  |  |
| **Cotrimoxazole use in the past 6 months** | | |  |  | **Cotrimoxazole use in the past 6 months** | | |  |  |
| Yes | 4 (28.6) | 1.72 (0.32-7.93) | 0.466 |  | Yes | 10 (71.4) | 4 (28.6) | 0.466 | Fisher's exact |
| No | 9 (18.7) | Reference |  |  | No | 39 (81.3) | 9 (18.7) |  |  |
| **Sexually active** |  |  |  |  | **Sexually active** |  |  |  |  |
| Yes | 8 (18.2) | 0.58 (0.14-2.69) | 0.495 |  | Yes | 36 (81.8) | 8 (18.2) | 0.495 | Fisher's exact |
| No | 5 (27.8) | Reference |  |  | No | 13 (72.2) | 5 (27.8) |  |  |
| **Frequency of using clean water only for vaginal hygiene** (Mean, SE) | 37.1 (6.0) | 1.02 (0.99-1.06) | 0.222 |  | **Frequency of using clean water only for vaginal hygiene** (Mean, SE) | 30.0 (2.5) | 37.1 (6.0) | 0.197 | Two-sample Wilcoxon rank-sum (Mann-Whitney) test |
| **Frequency of use of soap for vaginal hygiene (Mean, SE)** | 2.3 (2.3) | 0.97 (0.86-1.03) | 0.442 |  | **Frequency of use of soap for vaginal hygiene (Mean, SE)** | 6.2 (2.1) | 2.3 (2.3) | 0.459 | Two-sample Wilcoxon rank-sum (Mann-Whitney) test |
| **Frquency of use of steaming for vaginal hygiene (Mean, SE)** | 0.1 (0.2) | 0.73 (0.16-1.16) | 0.470 |  | **Frquency of use of steaming for vaginal hygiene (Mean, SE)** | 0.9 (0.4) | 0.1 (0.2) | 0.515 | Two-sample Wilcoxon rank-sum (Mann-Whitney) test |
| **Frequency of use of douching for vaginal hygiene (Mean, SE)** | 4.6 (3.1) | 0.99 (0.93-1.05) | 0.912 |  | **Frequency of use of douching for vaginal hygiene (Mean, SE)** | 5.4 (1.8) | 4.6 (3.1) | 0.958 | Two-sample Wilcoxon rank-sum (Mann-Whitney) test |
| **History of chronic disease** | |  |  |  | **History of chronic disease** | |  |  |  |
| Yes | 2 (15.4) | 0.69 (0.06-4.05) | 0.725 |  | Yes | 11 (84.6) | 2 (15.4) | 1.000 | Fisher's exact |
| No | 10 (20.8) | Reference |  |  | No | 38 (79.2) | 10 (20.8) |  |  |
|  |  |  |  |  | **Isolated bacteria** |  |  |  |  |
|  |  |  |  |  | Bacteria isolated and identified | 11 (73.3) | 4 (26.7) | 0.838 | Fisher's exact |
|  |  |  |  |  | Mixed Bacterial Growth | 11 (84.6) | 2 (15.4) |  |  |
|  |  |  |  |  | No Bacterial Growth/No Significant Bacterial Growth | 27 (79.4) | 7 (20.6) |  |  |
|  |  |  |  |  |  |  |  |  |  |
| **Table 9:** Urinalysis and isolated bacteria | | |  |  |  |  |  |  |  |
|  | **Isolated bacteria** | | **ROC Parameters, estimate (95% CI)** | | |  |  |  |  |
| **Leukocyte count (>10 cells/µl)** | **Yes** | **No** | **Sn** | **73.3% (62.3-84.3%)** | |  |  |  |  |
| Yes | 11 | 24 | Sp | 48.9% (36.5-61.4%) | |  |  |  |  |
| No | 4 | 23 | PPV | 31.4% (19.9-43.0%) | |  |  |  |  |
|  |  |  | NPV | 85.2% (76.3-94.0%) | |  |  |  |  |
|  |  |  | Area under ROC curve | 0.611 |  |  |  |  |  |
| **Presence of Leukocyte esterase** | |  | **Sn** | **66.7% (54.9-78.4%)** | |  |  |  |  |
| Yes | 10 | 35 | Sp | 22.5% (14.7-36.4%) | |  |  |  |  |
| No | 5 | 12 | PPV | 22.2% (11.9-32.6%) | |  |  |  |  |
|  |  |  | NPV | 70.6% (59.3-81.9%) | |  |  |  |  |
|  |  |  | Area under ROC curve | 0.539 |  |  |  |  |  |
| **Presence of Nitrites** |  |  | **Sn** | **33.3% (21.6-45.1%)** | |  |  |  |  |
| Yes | 5 | 6 | Sp | 87.2% (78.9-95.5%) | |  |  |  |  |
| No | 10 | 41 | PPV | 45.5% (33.1-57.9%) | |  |  |  |  |
|  |  |  | NPV | 80.4% (70.5-90.3%) | |  |  |  |  |
|  |  |  | Area under ROC curve | 0.603 |  |  |  |  |  |
|  |  |  |  |  |  |  |  |  |  |

Table 3: Antibiotics dispensed at previous and current UTI episodes

| **Participant ID** | **Participant Age** | **What is the participant's weight in kgs?** | **Diagnosis Date** | **Duration of symptoms (days)** | **Suprapubic pain** | **Painful micturition** | **Increased urinary frequency** | **Urinary urgency** | **Leucocute count >10 cells/ul** | **Presence of Leucocyte esterase** | **Presence of Nitrites** | **Antibiotic treatment given Abx 1** | **antibiotic 2** |
| --- | --- | --- | --- | --- | --- | --- | --- | --- | --- | --- | --- | --- | --- |
| KIT-E-TM 511 | 36 | 71 | 12/03/2025 | 5 |  | Yes | Yes |  | yes |  |  | Ciprofloxacin 500mg BD *5/7 |  |
| KIT-E-TM 512 | 29 | 83 | 12/03/2025 | 2 |  | Yes | Yes |  |  | yes |  | Nitrofurantoin 100mg TDS*1/52 |  |
| KIT-E-TM 521 | 66 | 66 | 06/03/2025 | 5 | Yes | Yes |  |  |  | yes |  | Cefixime 400mg od x 6/7 |  |
| KIT-E-TM 523 | 52 | 123 | 06/03/2025 | 4 | Yes | Yes |  |  |  | yes |  | Ciprofloxacin 500mg BD *5/7 |  |
| KIT-E-TM 524 | 36 | 61 | 06/03/2025 | 3 |  | Yes | Yes |  |  | yes |  | Ciprofloxacin 500mg BD *5/7 |  |
| KIT-E-TM 525 | 39 | 54 | 09/08/2024 | 4 |  | Yes | Yes |  | yes |  |  | Ciprofloxacin 500mg BD x 5/7 |  |
| KIT-E-TM 526 | 80 | 44 | 01/08/2024 | 14 | Yes | Yes |  |  | yes |  |  | Cefixime 200mg BD x 5/7, | Tinnidazole 500mg BD x 5/7 |
| KIT-E-TM 527 | 34 | 58 | 03/05/2024 | 7 | Yes |  | Yes |  | yes |  |  | Doxycycline 100mg BD x 6/7 |  |
| KIT-E-TM 528 | 24 | 55 | 18/02/2025 | 2 | Yes |  |  | Yes |  | yes | yes | Nitrofurantoin 100mg TDS*1/52 |  |
| KIT-E-TM 562 | 33 | 93 | 13/11/2024 | 3 | Yes | Yes |  |  | yes |  |  | Doxycycline 100mg BD x 6/7, | Metronidazole 400mg TDS x 5/7 |
| KIT-E-TM 563 | 24 | 65 | 26/02/2025 | 3 | Yes |  | Yes |  | yes |  |  | Nitrofurantoin 100mg OD*14/7 |  |
| KIT-E-TM 565 | 56 | 84 | 24/02/2025 | 2 | Yes | Yes | Yes |  | yes | yes |  | Nitrofurantoin 100mg TDS*1/52 |  |
| KIT-E-TM 566 | 30 | 52 | 27/02/2025 | 7 | Yes | Yes | Yes | Yes | yes | yes |  | Cefixime 400mg od x 1/52, | Nitrofurantoin 100mg tds x 1/52 |
| KIT-E-TM 567 | 38 | 60 | 27/02/2025 | 5 | Yes |  | Yes |  |  | yes |  | Cefixime 400mg od x 6/7, | Nitrofurantoin 100mg tds x 1/52 |
| KIT-E-TM 568 | 33 | 68 | 31/10/2024 | 60 | Yes | Yes |  |  | yes |  |  | Doxycycline 100mg BD x 5/7, | Metronidazole 400mg TDS x 5/7 |
| KIT-E-TM 569 | 35 | 56 | 27/02/2025 | 5 | Yes |  |  | Yes |  | yes |  | Cefixime 400mg od x 5/7 |  |
| KIT-E-TM 570 | 35 | 55 | 28/02/2025 | 5 | Yes | Yes | Yes | Yes | yes | yes |  | Nitrofurantoin 100mg TDS*1/52 |  |
| KIT-E-TM 571 | 43 | 81 | 03/03/2025 | 3 |  | Yes | Yes |  |  | yes |  | Ciprofloxacin 500mg BD *5/7 a | Nitrofurantoin 100mg TDS *1/52 |
| KIT-E-TM 572 | 42 | 49 | 03/03/2025 | 7 | Yes | Yes | Yes | Yes |  | yes |  | Nitrofurantoin 100mg TDS*1/52 |  |
| KIT-E-TM 573 | 46 | 73 | 03/03/2025 | 7 |  | Yes | Yes | Yes |  | yes |  | Ciprofloxacin 500mg BD *5/7 | Nitrofurantoin 100mg TDS *1/52 |
| KIT-E-TM 574 | 43 | 62 | 13/11/2024 | 3 | Yes | Yes |  |  | yes |  |  | Cefixime 400mg od x 5/7, |  |
| KIT-E-TM 575 | 66 | 59 | 06/03/2025 | 3 |  |  | Yes | Yes |  | yes |  | Nitrofurantoin 100mg TDS*6/7 |  |
| KIT-E-TM 576 | 40 | 66 | 06/03/2025 | 4 | yes | Yes |  |  |  | yes |  | Cefixime 400mg od x 5/7 |  |
| KIT-E-TM 577 | 49 | 58 | 06/03/2025 | 5 | yes | Yes |  |  |  | yes | yes | Ciprofloxacin 500mg BD *6/7 |  |
| KIT-E-TM 578 | 43 | 95 | 06/03/2025 | 5 | yes | Yes |  |  |  | yes |  | Cefixime 400mg od x 1/52 |  |
| KIT-E-TM 580 | 35 | 83 | 09/04/2024 | 5 | yes |  | Yes |  | yes |  |  | Doxycycline 100 mg BD x 5/7 |  |
| KIT-E-TM 581 | 35 | 65 | 25/02/2025 | 3 | Yes | Yes |  |  | yes | yes | yes | Cefixime 400mg od x 1/52 |  |
| KIT-E-TM 583 | 40 | 101 | 26/02/2025 | 7 | Yes | Yes |  |  | yes | yes | yes | Ciprofloxacin 500mg BD *5/7 | Nitrofurantoin 100mg TDS *1/52 |
| KIT-E-TM 584 | 21 | 53 | 26/02/2025 | 6 | Yes |  | Yes |  |  | yes |  | Cefixime 400mg od x 5/7, | Nitrofurantoin 100mg TDS *1/52 |
| KIT-E-TM 585 | 32 | 51 | 07/01/2025 | 3 |  | Yes | Yes |  | yes |  |  | Cefixime 400mg od x 5/7 |  |
| KIT-E-TM 586 | 32 | 85 | 21/11/2024 | 4 | Yes |  |  | Yes | yes |  |  | Cefixime 400mg od x 5/7 |  |
| KIT-E-TM 587 | 23 | 72 | 06/02/2025 | 2 | Yes | Yes |  |  | yes | yes |  | Cefixime 400mg od x 1/52, | Nitrofurantoin 100mg TDS *1/52 |
| KIT-E-TM 588 | 49 | 54 | 21/11/2024 | 7 | Yes | Yes |  |  | yes |  |  | Ciprofloxacin 500 MG BD x 6/7 |  |
| KIT-E-TM 589 | 41 | 65 | 03/03/2025 | 5 | Yes |  |  | Yes | yes | yes | yes | Cefixime 400mg od x 1/52, | Nitrofurantoin 100mg TDS *1/52 |
| KIT-E-TM 591 | 25 | 92 | 04/03/2025 | 4 | Yes |  | Yes |  | yes | yes |  | Cefixime 400mg od x 6/7 |  |
| KIT-E-TM 592 | 23 | 60 | 04/03/2025 | 6 | Yes | Yes |  |  | yes | yes |  | Nitrofurantoin 100mg TDS*1/52 |  |
| KIT-E-TM 593 | 25 | 54 | 15/01/2025 | 14 | Yes | Yes |  |  | yes |  |  | IV Ceftriaxone 2g od x 3/7 |  |
| KIT-E-TM 594 | 33 | 48 | 04/03/2025 | 4 | Yes | Yes |  |  | yes | yes |  | Ciprofloxacin 500mg BD *6/7 |  |
| KIT-E-TM 595 | 30 | 60 | 22/06/2024 | 5 | Yes |  | Yes |  | yes |  |  | Cefixime 200mg BD x 5/7, | Metronidazole 400mg TDS x 5/7 |
| KIT-E-TM 596 | 54 | 73 | 04/03/2025 | 14 | Yes | Yes |  |  |  | yes |  | Nitrofurantoin 100mg TDS*1/52 |  |
| KIT-E-TM 597 | 34 | 71 | 04/03/2025 | 5 | Yes | Yes | Yes |  |  | yes |  | Cefixime 400mg od x 1/52 |  |
| KIT-E-TM 598 | 25 | 60 | 06/03/2025 | 3 | Yes | Yes |  |  | yes | yes |  | Cefixime 400mg od x 5/7, | Nitrofurantoin 100mg TDS *1/52 |
| KIT-E-TM 601 | 44 | 63 | 07/03/2025 | 4 | Yes | Yes |  |  | yes | yes | yes | Cefixime 400mg od x 1/52, | Nitrofurantoin 100mg TDS *1/53 |
| KIT-E-TM 602 | 26 | 48 | 07/03/2025 | 3 | Yes | Yes |  |  |  | yes |  | Ciprofloxacin 500mg BD *5/7 | Nitrofurantoin 100mg TDS *1/54 |
| KIT-E-TM 603 | 35 | 85 | 07/03/2025 | 5 |  | Yes | Yes |  | yes | yes | yes | Ciprofloxacin 500mg BD *1/52 | Nitrofurantoin 100mg TDS *1/55 |
| KIT-E-TM 604 | 46 | 90 | 06/09/2024 | 14 | Yes | Yes |  |  | yes |  |  | Doxycycline 100mg BD x 5/7 |  |
| KIT-E-TM 605 | 35 | 65 | 07/03/2025 | 4 |  | Yes | Yes |  |  | yes |  | Ciprofloxacin 500mg BD *5/7 | Nitrofurantoin 100mg TDS *1/55 |
| KIT-E-TM 606 | 40 | 80 | 05/09/2024 | 5 | Yes | Yes |  |  | yes |  |  | Cefixime 400mg od x 5/7 |  |
| KIT-E-TM 607 | 40 | 92 | 11/03/2025 | 5 | Yes | Yes |  |  | yes | yes | yes | Ciprofloxacin 500mg BD *1/52 | Nitrofurantoin 100mg TDS *1/55 |
| KIT-E-TM 608 | 53 | 95 | 11/03/2025 | 7 |  | Yes | Yes |  | yes | yes | yes | Cefixime 400mg od x 6/7, | Nitrofurantoin 100mg TDS *1/55 |
| KIT-E-TM 609 | 24 | 60 | 12/03/2025 | 14 | Yes | Yes |  |  | yes | yes | yes | Cefixime 400mg od x 1/52, | Nitrofurantoin 100mg TDS *1/55 |
| KIT-E-TM 610 | 63 | 85 | 07/03/2025 | 5 | Yes |  | Yes |  |  | yes |  | Cefixime 400mg od x 5/7 |  |
| KIT-E-TM 611 | 49 | 87 | 07/03/2025 | 3 |  | Yes | Yes |  |  | yes |  | Nitrofurantoin 100mg TDS*1/52 |  |
| KIT-E-TM 612 | 35 | 81 | 07/03/2025 | 5 |  |  | Yes | Yes | yes |  |  | Nitrofurantoin 100mg TDS*1/52 |  |
| KIT-E-TM 613 | 55 | 68 | 05/03/2025 | 4 |  | Yes | Yes |  | yes | yes |  | Ciprofloxacin 500mg BD *5/7 | Nitrofurantoin 100mg TDS *1/55 |
| KIT-E-TM 614 | 29 | 70 | 05/03/2025 | 3 | Yes | Yes |  |  | yes | yes |  | Cefixime 400mg od x 6/7 |  |
| KIT-E-TM 615 | 47 | 54 | 05/03/2025 | 4 | Yes | Yes |  |  |  | yes | yes | Nitrofurantoin 100mg OD*1/52 |  |
| KIT-E-TM 616 | 36 | 74 | 05/03/2025 | 4 | Yes | Yes | Yes |  |  | yes |  | Ciprofloxacin 500mg BD *5/7 |  |
| KIT-E-TM 617 | 40 | 70 | 05/03/2025 | 4 |  |  | Yes | Yes |  | yes |  | Ciprofloxacin 500mg BD *6/7 |  |
| KIT-E-TM 618 | 54 | 78 | 06/03/2025 | 5 | Yes | Yes |  |  |  | yes |  | Cefixime 400mg od x 5/7, | Nitrofurantoin 100mg TDS *1/55 |
| KIT-E-TM 619 | 45 | 70 | 07/03/2025 | 3 | Yes | Yes |  |  |  | yes |  | Ciprofloxacin 500mg BD *6/7 |  |
| KIT-E-TM 623 | 35 | 66 | 07/03/2025 | 2 | Yes | Yes |  |  |  | yes |  | Nitrofurantoin 100mg OD*6/7 |  |

Table 4: Metadata i.e Participant number and UTI phenotype (for microbiome analysis)

| **PTID** | **Bacterial pathogen isolated on urine cullture** | **Type of UTI** | **Type of UTI** |
| --- | --- | --- | --- |
| KIT-E-TM 511 |  |  | Isolated UTI |
| KIT-E-TM 512 |  |  | Isolated UTI |
| KIT-E-TM 521 | E.coli |  | Isolated UTI |
| KIT-E-TM 523 |  | Recurrent UTI |  |
| KIT-E-TM 526 | E.coli | Recurrent UTI |  |
| KIT-E-TM 528 | E.coli |  | Isolated UTI |
| KIT-E-TM 562 |  | Recurrent UTI |  |
| KIT-E-TM 563 |  |  | Isolated UTI |
| KIT-E-TM 565 |  |  | Isolated UTI |
| KIT-E-TM 566 | E.coli |  | Isolated UTI |
| KIT-E-TM 567 |  |  | Isolated UTI |
| KIT-E-TM 568 |  | Recurrent UTI |  |
| KIT-E-TM 569 |  |  | Isolated UTI |
| KIT-E-TM 570 |  |  | Isolated UTI |
| KIT-E-TM 571 |  |  | Isolated UTI |
| KIT-E-TM 574 |  | Recurrent UTI |  |
| KIT-E-TM 575 |  |  | Isolated UTI |
| KIT-E-TM 576 |  |  | Isolated UTI |
| KIT-E-TM 577 | E.coli |  | Isolated UTI |
| KIT-E-TM 578 | E.coli |  | Isolated UTI |
| KIT-E-TM 580 | E.coli |  | Isolated UTI |
| KIT-E-TM 581 |  |  | Isolated UTI |
| KIT-E-TM 584 |  |  | Isolated UTI |
| KIT-E-TM 585 | E.coli | Recurrent UTI |  |
| KIT-E-TM 586 |  | Recurrent UTI |  |
| KIT-E-TM 587 |  |  | Isolated UTI |
| KIT-E-TM 588 |  | Recurrent UTI |  |
| KIT-E-TM 589 |  |  | Isolated UTI |
| KIT-E-TM 591 | E.coli |  | Isolated UTI |
| KIT-E-TM 592 |  |  | Isolated UTI |
| KIT-E-TM 593 |  | Recurrent UTI |  |
| KIT-E-TM 594 |  |  | Isolated UTI |
| KIT-E-TM 595 |  | Recurrent UTI |  |
| KIT-E-TM 597 |  |  | Isolated UTI |
| KIT-E-TM 598 |  |  | Isolated UTI |
| KIT-E-TM 601 |  |  | Isolated UTI |
| KIT-E-TM 603 |  |  | Isolated UTI |
| KIT-E-TM 604 |  | Recurrent UTI |  |
| KIT-E-TM 605 |  |  | Isolated UTI |
| KIT-E-TM 606 | E.coli | Recurrent UTI |  |
| KIT-E-TM 608 | Citrobacter |  | Isolated UTI |
| KIT-E-TM 609 |  |  | Isolated UTI |
| KIT-E-TM 610 |  |  | Isolated UTI |
| KIT-E-TM 611 |  |  | Isolated UTI |
| KIT-E-TM 613 |  |  | Isolated UTI |
| KIT-E-TM 614 |  |  | Isolated UTI |
| KIT-E-TM 616 |  |  | Isolated UTI |
| KIT-E-TM 618 |  |  | Isolated UTI |
| KIT-E-TM 619 |  |  | Isolated UTI |

**Supplemenatry Microbiome results.**

***
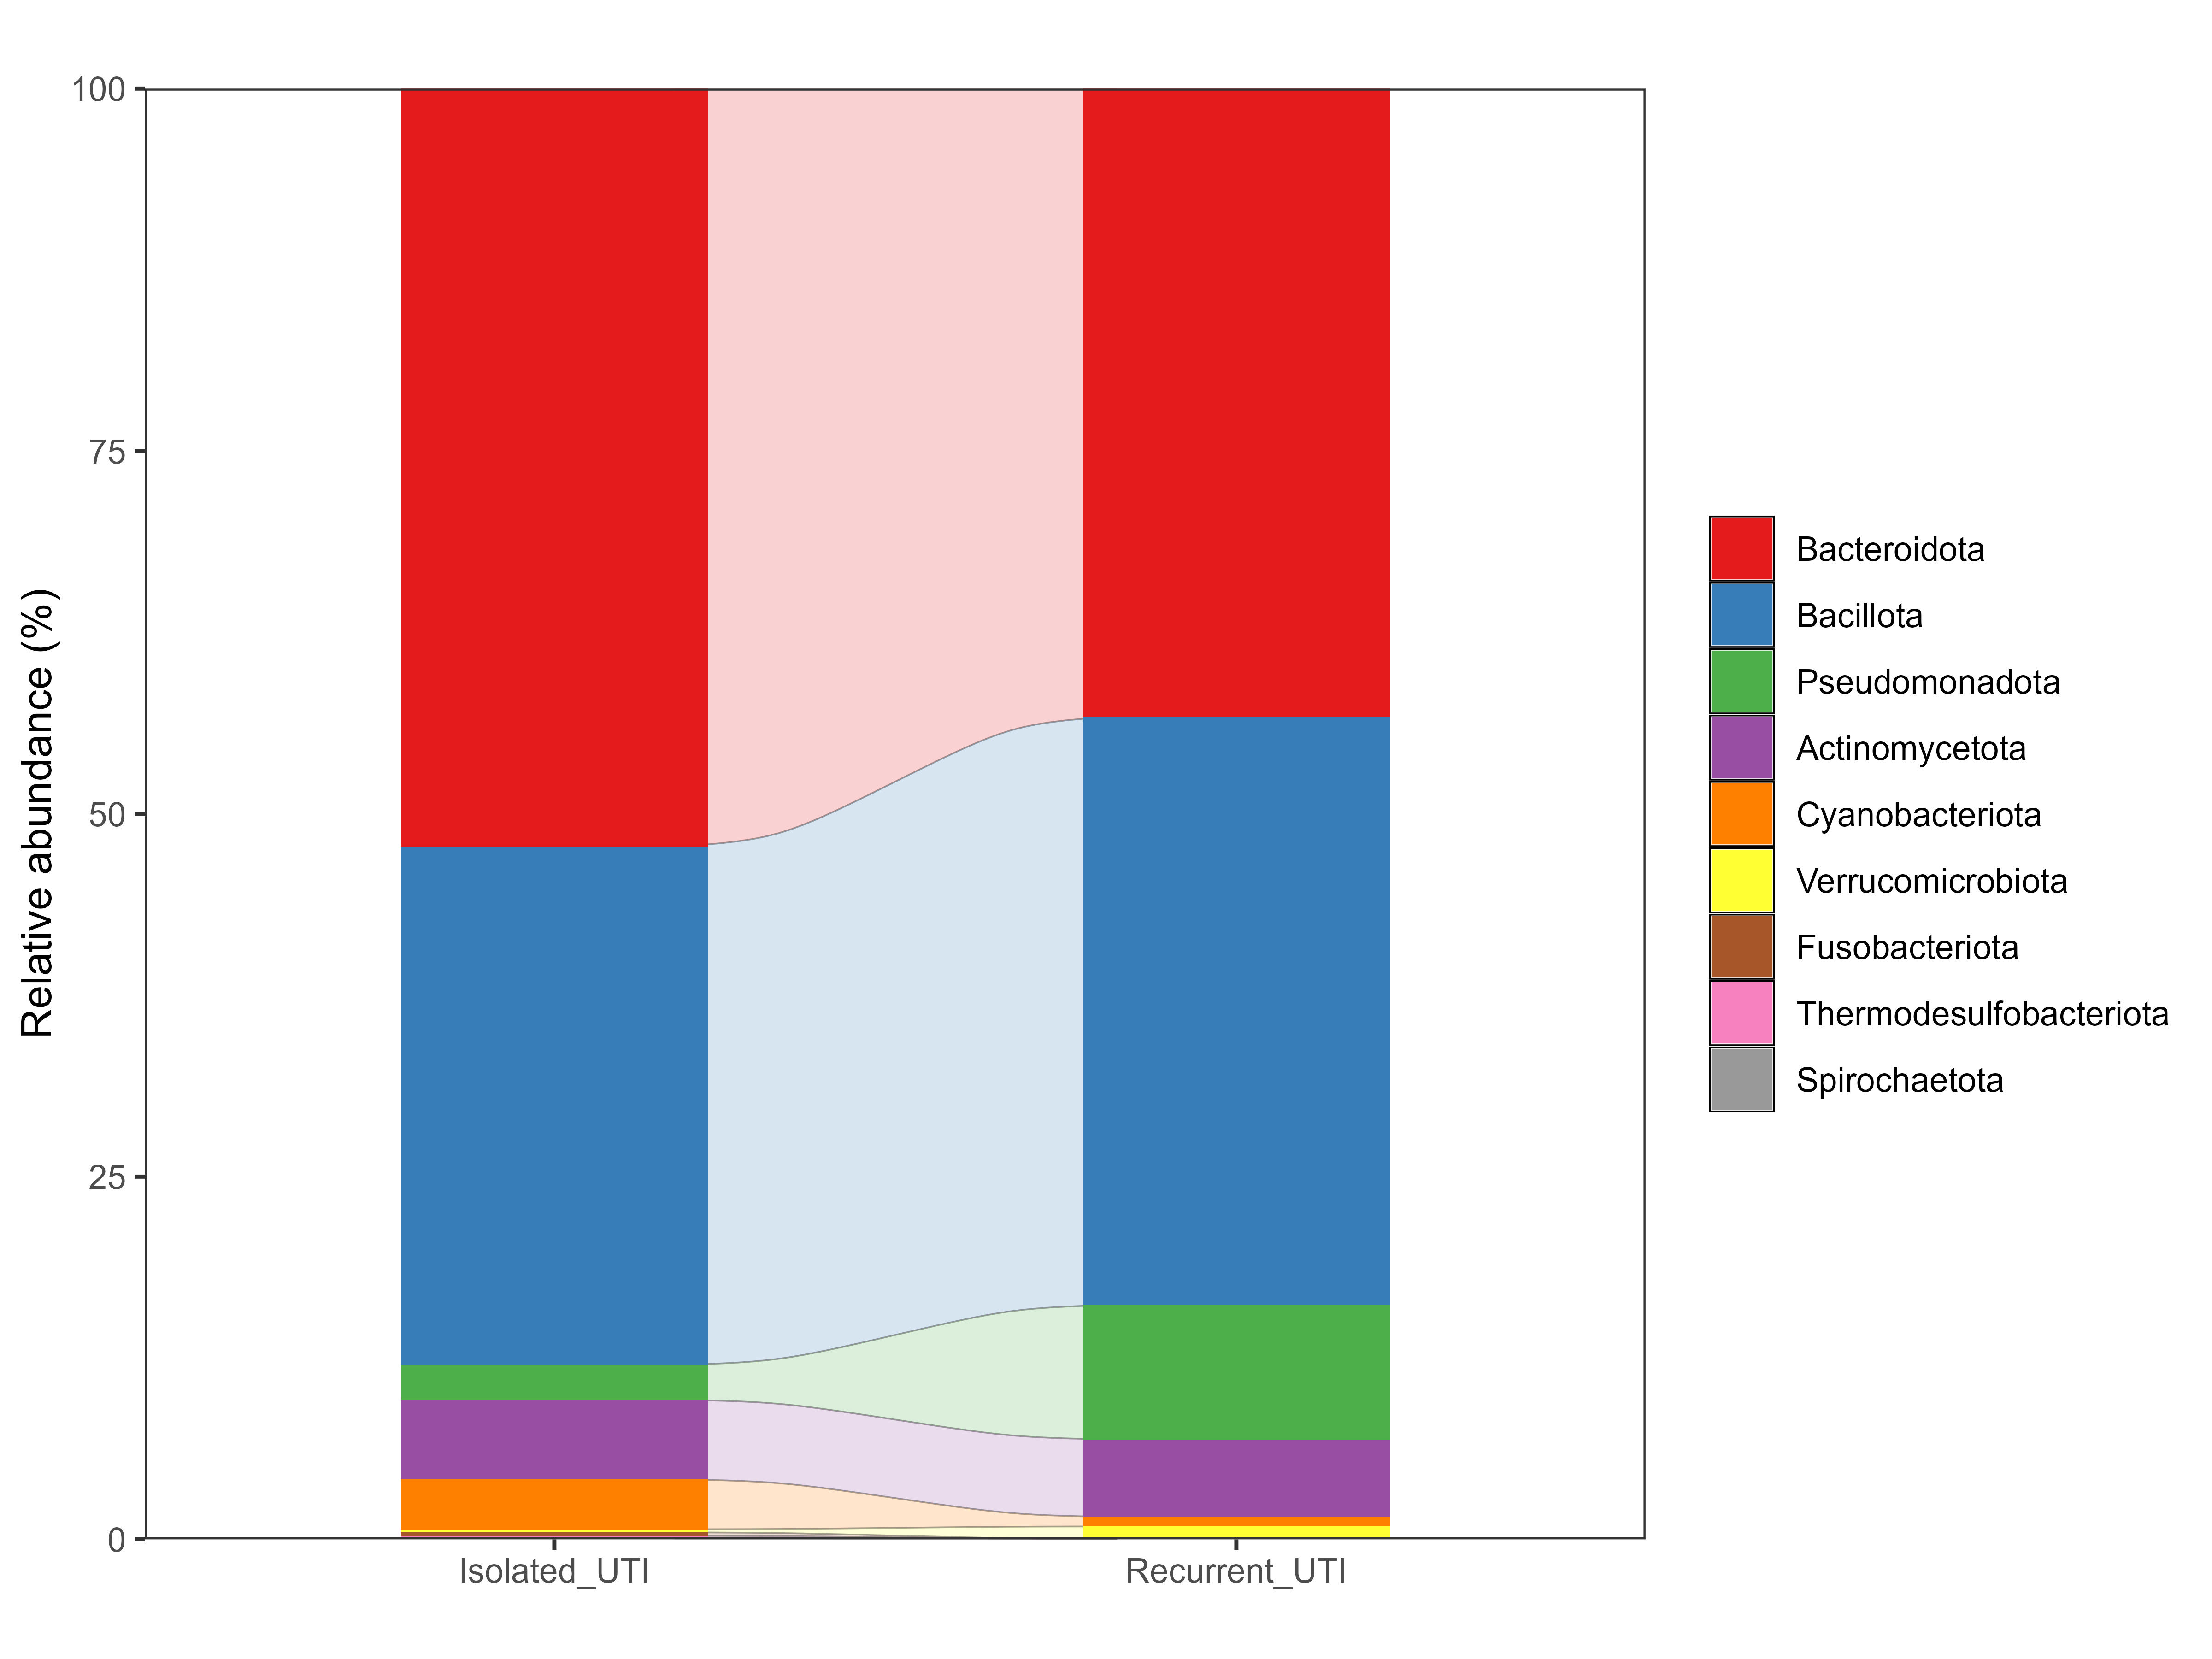
***

Figure 1: Taxonomic Composition of Gut Microbiota by UTI Status

*Stacked bar plots and alluvial diagrams showing the relative abundance of bacterial taxa at the phylum and genus levels in recurrent versus isolated UTI samples. Dominant phyla included Bacteroidota and Bacillota, with no major phylum-level shifts. Notable genus-level differences included relative depletion of Faecalibacterium and Ruminococcus in recurrent UTIs and increased presence of low-abundance or unclassified genera, suggesting potential taxonomic instability or dysbiosis.*

**
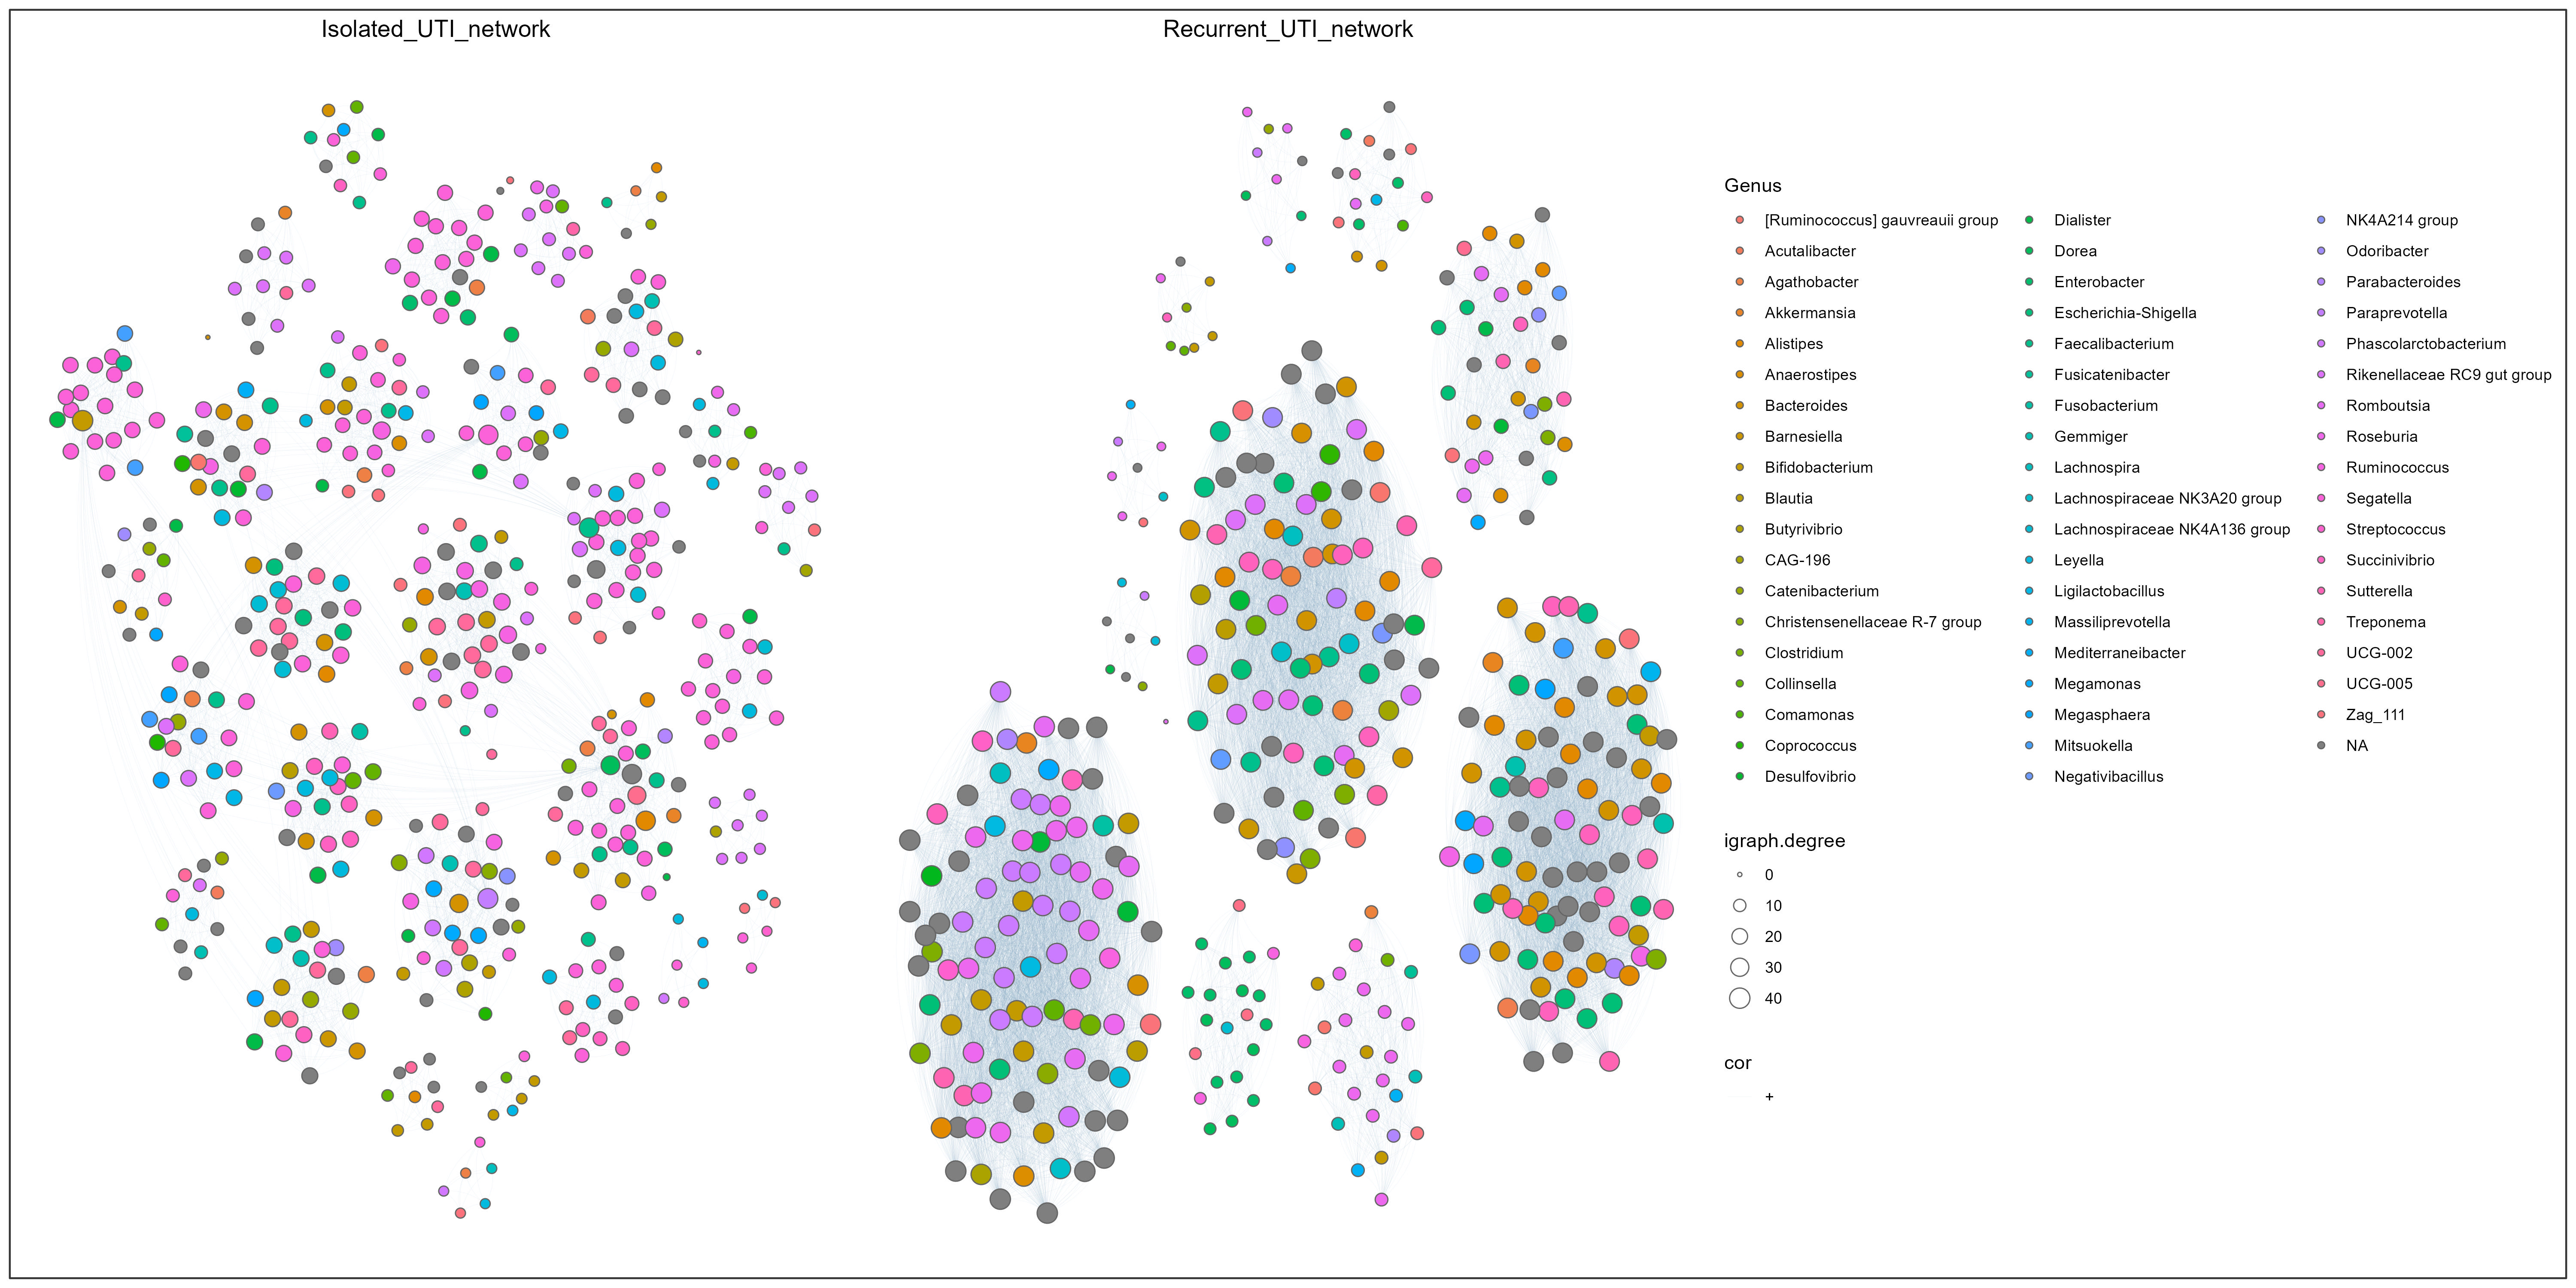
**

Figure 2: Microbial Co-Occurrence Networks in Recurrent and Isolated UTIs

Alternate network visualization using enhanced clustering and color palette to emphasize network compactness and central taxa. Notably, recurrent UTI networks show elevated prevalence of unidentified genera and greater hub-like structure, indicating potential community convergence or instability.
